# Supplementary material
Source: PubMed Central journal article supplement (PMC7964158)
Supplement: 1704_tables.pdf [file 1704_tables.pdf]

**On-line Table 1: Most important radiologically identifiable causes of tinnitus**

| Causes                                                                                                                                        |
|-----------------------------------------------------------------------------------------------------------------------------------------------|
| Pulsatile tinnitus                                                                                                                            |
| Vascular causes                                                                                                                               |
| Aberrant ICA                                                                                                                                  |
| Dehiscent ICA                                                                                                                                 |
| Stenosed ICA                                                                                                                                  |
| Aberrant anterior inferior cerebellar artery                                                                                                  |
| High-riding jugular bulb                                                                                                                      |
| Dehiscent jugular bulb                                                                                                                        |
| Aberrant sigmoid sinus                                                                                                                        |
| Stenosed dural sinus                                                                                                                          |
| Persistent stapedial artery                                                                                                                   |
| AVM                                                                                                                                           |
| AVF                                                                                                                                           |
| Aneurysm                                                                                                                                      |
| Carotid artery dissection                                                                                                                     |
| Fibromuscular dysplasia                                                                                                                       |
| Venous hum due to increased venous flow in thyrotoxicosis, increased cardiac output from anemia, or compression of the proximal jugular vein. |
| Tumors                                                                                                                                        |
| Paraganglioma: glomus tympanicum or jugulotympanicum.                                                                                         |
| Ossifying hemangioma                                                                                                                          |
| Cavernous hemangioma                                                                                                                          |
| Sclerosing dysplasias                                                                                                                         |
| Otospongiosis or otosclerosis                                                                                                                 |
| Paget disease                                                                                                                                 |
| Raised intracranial pressure                                                                                                                  |
| Benign intracranial hypertension (pseudotumor cerebri)                                                                                        |
| Nonpulsatile tinnitus                                                                                                                         |
| Vestibular or facial nerve schwannoma                                                                                                         |
| Brain stem disease like multiple sclerosis and stroke                                                                                         |
| Chiari I malformation                                                                                                                         |
| MD                                                                                                                                            |
| Drugs (aspirin, NSAIDs, loop diuretics, aminoglycosides)                                                                                      |
| Muscular tinnitus                                                                                                                             |
| Patulous eustachian tube                                                                                                                      |
| TMJ disease                                                                                                                                   |
| Any cause that produces hearing loss                                                                                                          |
| No identifiable cause                                                                                                                         |

**On-line Table 2: Imaging search pattern for tinnitus based on anatomic lesion location**

| Pattern                                                                     |
|-----------------------------------------------------------------------------|
| Scalp                                                                       |
| AVM                                                                         |
| Middle ear                                                                  |
| Glomus tympanicum                                                           |
| Glomus jugulotympanicum                                                     |
| Aberrant or dehiscent ICA                                                   |
| Dehiscent jugular bulb                                                      |
| Cavernous hemangioma                                                        |
| Temporal bone                                                               |
| Abnormal lucency or sclerosis                                               |
| Otospongiosis or otosclerosis                                               |
| Paget disease                                                               |
| Temporal bone meningioma                                                    |
| Foramina/canals                                                             |
| Aberrant or dehiscent ICA (carotid canal and inferior tympanic canaliculus) |
| Persistent stapedial artery (foramen spinosum and facial nerve canal)       |
| Facial nerve                                                                |
| Hemangioma                                                                  |
| Jugular foramen                                                             |
| Glomus jugulare or jugulotympanicum                                         |
| Membranous labyrinth                                                        |
| MD                                                                          |
| Internal acoustic canal/cerebellopontine angle                              |
| Vestibular schwannoma                                                       |
| Aberrant anterior inferior cerebellar artery loop                           |
| Aneurysm                                                                    |
| Brain/intracranial                                                          |
| Brain stem disease like multiple sclerosis and stroke                       |
| Chiari I malformation                                                       |
| Idiopathic intracranial hypertension (pseudotumor cerebri)                  |
| Dural sinus stenosis                                                        |
| AVM                                                                         |
| Dural AVF                                                                   |
| Neck                                                                        |
| Carotid artery dissection or stenosis                                       |
| Fibromuscular dysplasia                                                     |
| Venous obstruction                                                          |
| TMJ                                                                         |
